# Supplementary material for: Does beer, wine or liquor consumption correlate with the risk of renal cell carcinoma? A dose-response meta-analysis of prospective cohort studies
Source: PubMed Central journal article supplement (PMC4537019; doi:10.18632/oncotarget.3749), 2015-04-29
Supplement: oncotarget-06-13347-s001.pdf [file oncotarget-06-13347-s001.pdf]

SUPPLEMENTARY FIGURES

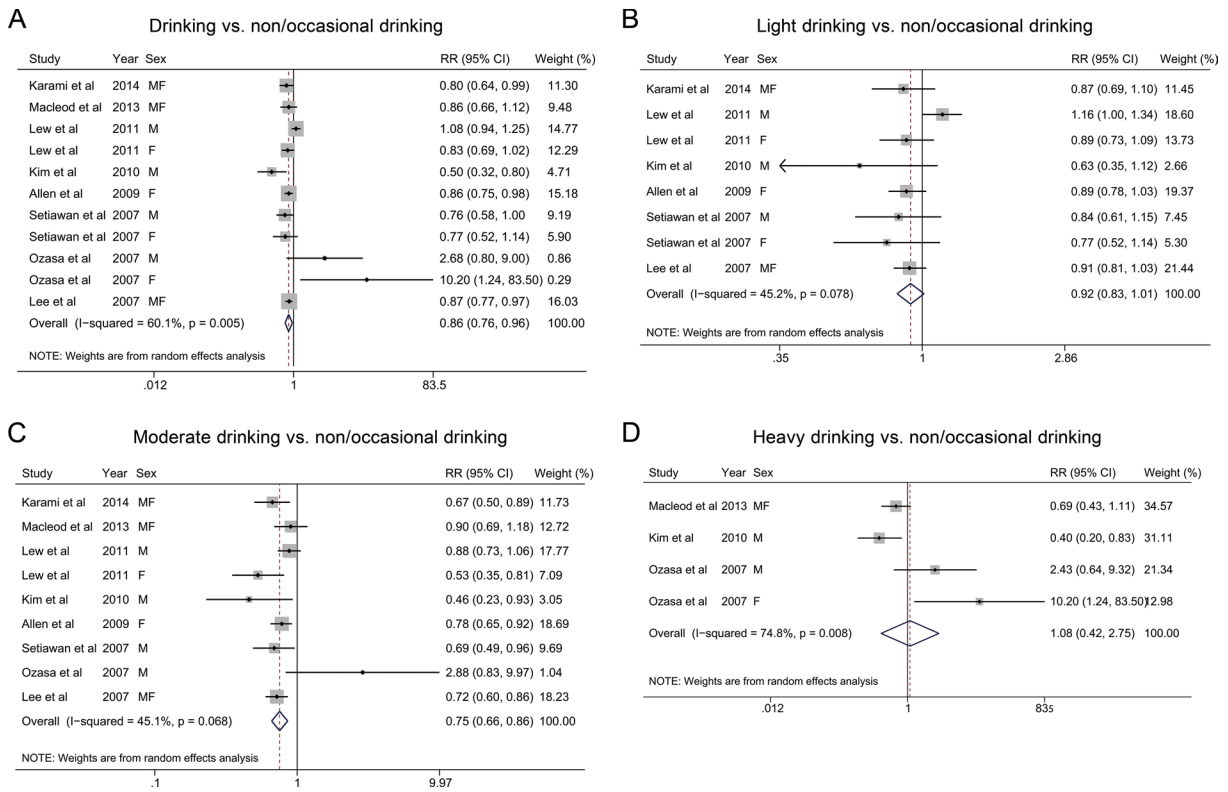

Supplementary Figure S1: Forest plots for pooled relative risks (RRs) and the corresponding 95% confidence intervals (CIs) of renal cell carcinoma (RCC) risk for any A. light B. moderate C. and heavy D. drinking.

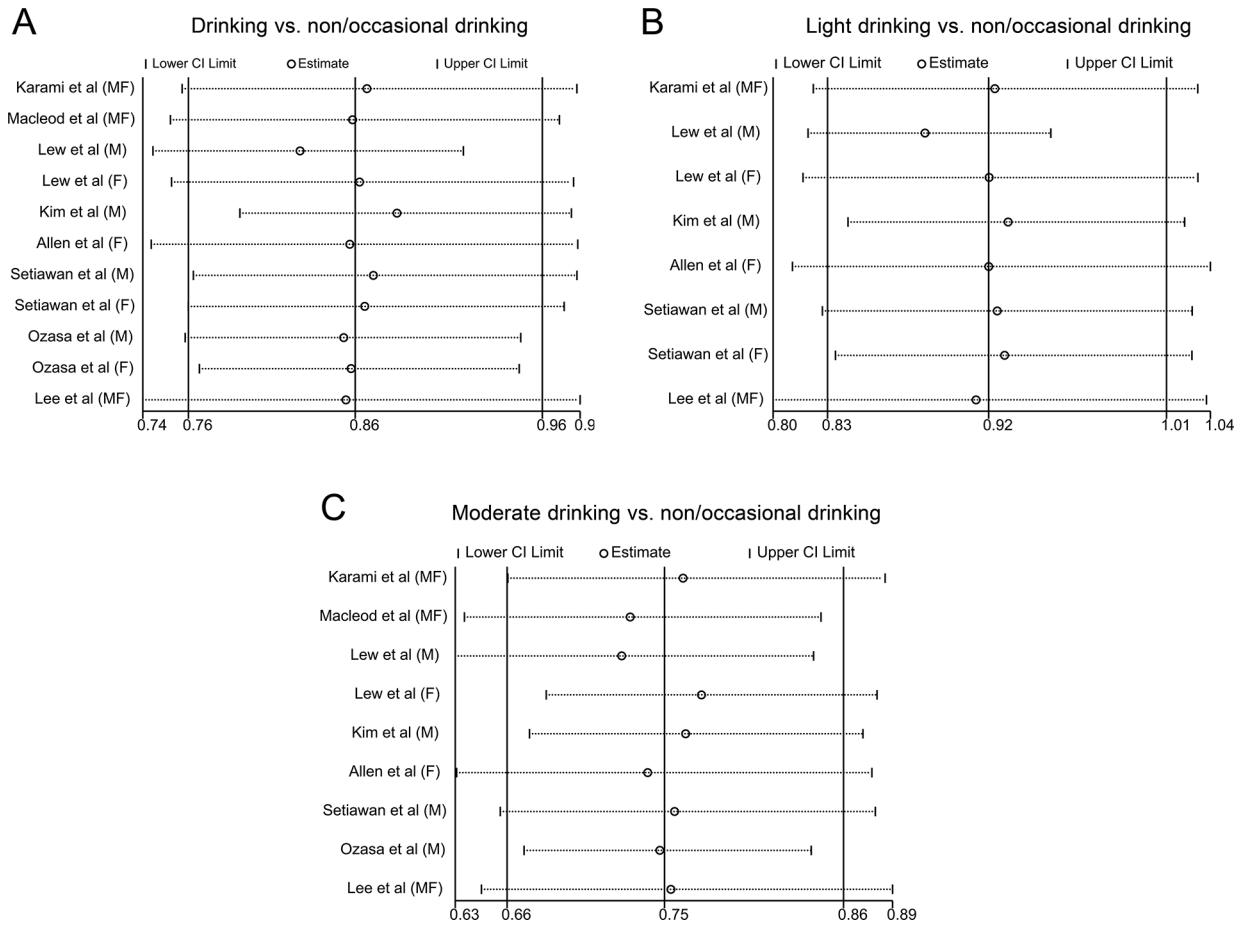

**Supplementary Figure S2: Sensitivity analysis for any A. light B. and moderate C. drinking.** Given name study is omitted.
